# Supplementary material for: Maternal Race–Ethnicity, Immigrant Status, Country of Birth, and the Odds of a Child With Autism
Source: PubMed Central journal article supplement — Child Neurol Open. 2017 Jan 12;4:2329048X16688125. doi: 10.1177/2329048X16688125 (PMC5417283; doi:10.1177/2329048x16688125), 2017-01-12
Supplement: Tables_CNO-2016-06-0005.R2.pdf [file Tables_CNO-2016-06-0005.R2.pdf]

Supplementary Table 1: Maternal region of birth

| <b>Region</b>               | <b>Description</b>                                                                                                                                                                                                                                                                                                                                                            |
|-----------------------------|-------------------------------------------------------------------------------------------------------------------------------------------------------------------------------------------------------------------------------------------------------------------------------------------------------------------------------------------------------------------------------|
| <b><i>Australia</i></b>     | All Australian states and mainland territories                                                                                                                                                                                                                                                                                                                                |
| <b><i>Central Asia</i></b>  | Maternal countries of birth were: Cambodia, Laos, Myanmar, Thailand, Turkestan and Vietnam                                                                                                                                                                                                                                                                                    |
| <b><i>South Asia</i></b>    | Includes countries in Southern Asia or south-east of this region. Maternal countries of birth were: Borneo, Brunei, Christmas Island, Cocos Islands, Cook Islands, Fiji, Malaysia, New Guinea, , Philippines, Samoa, Singapore, Solomon Islands and Tonga.                                                                                                                    |
| <b><i>Other Asia</i></b>    | Includes countries in East, West and North Asia. Maternal countries of birth were: Afghanistan, Armenia, Bahrain, Bangladesh, Bhutan, China, Cyprus, India, Iran, Iraq, Israel, Japan, Jordan, Kazakhstan, Korea, Kurdistan, Lebanon, Maldives, Mongolia, Nepal, Pakistan, Palestine, Qatar, Russia, Saudi Arabia, Siberia, Sri Lanka, United Arab Emirates, Syria and Yemen. |
| <b><i>East Africa</i></b>   | Maternal countries of birth were: Ethiopia, Kenya, Madagascar, Malawi, Mauritius, Mozambique, Reunion Island, Rodriguez Island, Seychelles, Somalia, Swaziland, Tanzania, Uganda and Zimbabwe.                                                                                                                                                                                |
| <b><i>Other Africa</i></b>  | Includes Algeria, Angola, Botswana, Chad, Congo, Gambia, Nigeria, Ivory Coast, Lesotho, Namibia, Rwanda, South Africa Sudan, Zaire and Zambia and nearby islands not included in East Africa region                                                                                                                                                                           |
| <b><i>Other regions</i></b> | Includes islands associated with Australia; New Zealand and associated islands; United States, Canada and associated islands; United Kingdom and associated islands; Europe and associated islands; South America and associated islands; Central America and associated islands.                                                                                             |
